# Supplementary material for: Distinct Mechanisms Underlying Tolerance to Intermittent and Constant Hypoxia in Drosophila melanogaster
Source: PLoS One. 2009 Apr 29;4(4):e5371. doi: 10.1371/journal.pone.0005371 (PMC2670512; doi:10.1371/journal.pone.0005371)
Supplement: Table S3 — Percentage Survival of adult flies of P-elements(or EP lines)after being exposed to 1.5% CH for 7 days. (0.02 MB XLS) [file pone.0005371.s003.xls]

## Sheet: Sheet1
Table S3 - Percentage Survival of adult flies of P-elements and
EP lines after being exposed to 1.5% Constant hypoxia for 7 days
Gene	P-element mutant genotype	% survival
control	CS	31 ± 4.21
control	yw	17.5 ± 2.1
ndl	mwh1 ndlrm5 red1 e1/TM1	23 ± 3.33
ndl	mwh1 ndl7 red1 e1/TM1	37.3 ± 3.33
CG9864	w1118; P{EP}EP628	0
CG5707	w1118; P{XP}CG5707	28 ± 8.5
CG33523	y1 w67c23; P{EPgy2}EY01207	0
CG33523	w1118; PBac{RB}CG33523e03176	13.33 ± 5.77
CG6006	w1118; P{XP}CG6006d09073	60 ± 11.5
repo	ry506 P{PZ}repo03702/TM3, ryRK Sb1 Ser1	45.6 ± 14.15
repo	repo1	48.5 ± 10.11
CG30437	w1118; PBac{WH}CG30437f04551/CyO	23.5 ± 13.33
CG30437	y1 w1118; PBac{3HPy+}C127/CyO	0
DI	Dl7/TM2	0
CG10659	y1 w67c23; P{SUPor-P}KG07449	9.09 ± 5.77
Eip71CD	y1 w67c23; P{EPgy2}Eip71CDEY05753	58 ± 6.77
Hrb98DE	y1 w1118; PBac{5HPw+}Hrb98DEA544/TM3, Sb1 Ser1	0 ± 0
ap	ap4/SM5	60 ± 0
CG5150	w1118; PBac{WH}CG5150f05027	15 ± 2.3
PNUTS	y1; P{SUPor-P}PNUTSKG00572/CyO; ry506	65.5 ± 1.5
Pabp2	y1; P{SUPor-P}Pabp2KG02359/CyO; ry506	40 ± 17
Hsp70Bbb	P{y[+t7.7]=Mae-UAS.6.11}Hsp70Bbb	70.6 ± 5.6
Hsp70Aa	P{wHy}Hsp70Aa	69.1 ± 3.9
Hsp27	EP329	10 ± 0
Hsp27	EP3220	15 ± 2.5
GstD2	EP564	12.5 ± 1.5
GstE1	EP2230	10 ±3.33
Thor	EP818	0
trbl	EP119	0
Gllspla2	EP325	0
bmm	EP3174	0
puc	EP1225	0
bun	EP488	30 ± 10.2
bun	EP830	0
CG1673	EP1023	0
Hsp70Ba	w1118; Hsp70Ba304	48.33 ± 3.33
CG1600	y1 w67c23; P{SUPor-P}CG1600KG03987	67 ± 12
CG1600	w1118; P{EP}CG1600EP398/CyO	70 ± 2.5
Hsp23	w[1118]; P{w[+mGT]=GT1}BG01483	55 ± 5.77
CG42345	w[1118]; PBac{w[+mC]=WH}CG42345[f04551]/CyO	16 ± 3.33
CG42345	y[1] w[1118]; PBac{y[+mDint]=3HPy[+]}CG42345[C127]/CyO	0
Cyp309a1	y[1]; P{y[+mDint2] w[BR.E.BR]=SUPor-P}KG02086; ry[506]	20 ± 1.5
